# Supplementary material for: Identification and Characterization of HAESA-Like Genes Involved in the Fruitlet Abscission in Litchi
Source: MDPI journal article supplement (doi:10.3390/ijms20235945), 2019-11-26
Supplement: s1 [file s1]

**>LcHAE (ID number: LITCHI029130.m1)**

MLVFLLCILISSPPLLTLSLNQDGLLLQRVKLGLSDPQTQSLSSWDNNSRDETPCNWQGV  
CDSLRRVAVNLDHFQLSGPFPLFFCRLPYLTDLSMFDNSINSTLPLAISTCRNLTYLN  
LASNLLVGTVPASLAEMPNLRIILDLSANNFSGDIPARFGEVSQLEFLNLAGNLLNGKIPG  
WLGNFSSLKELDLAYNPFTPGPIPSELGNMSNLEHLWLAQC�LVGQIPESLTRNLKLN  
DLAINRLSGSIPSSLTQLSIEQIELYQNSFSGELPVKWLNTKTLRRFDASTNHFTGTIP  
HELCELQLGSLNLFENRLEGTIPDTIAQSKNLYELKLFNNNLHGELPSQLGKNSPLTALD  
VSYNQLTGGIPNGLCSKGSLEDLILIHNSFSGQIPESLGRCQSLRRVRLKQNLSSGSVPE  
GLWGVPHMYLFELAENSFTGSIPRRISGAYNLSMFLISKNQFSGSIPDEVGGLGNLVEFS  
ASENRFTGRIPGNLVHLDQLGKLDLSQNELSGAMPQGIQRWRNLNELSLANNRLSGEIPS  
EIGSLPVLNYLDLSGNLFSGKIPLELQNLKLNLLNLSNNKLSGQLPPLYAKEIYRNSFVG  
NPGLCGDLADLCPETGVSKSQGYMWVLRISIFVLAAVVFIVGVWVFYVKFRSFKKTKKGIA  
ISKWKSFHRIGFSEFDVIDCLKEENLIGSGASGKVYKAVLRNGEAVAVKKLFERSKKDDT  
SNGSLKDQFEAEVETLGKIRHKNIIVRLWCCCSNGESKLLVYEYMPNGSLGDLHSSKAGL  
LDWPTRYKIALDAAEGLSYLHHDCVPPIVHRDVKSNNILLDAEFSARVADFGVAKVVDGL  
NKGQESMSVIAGSCGYIAPEYAYTLRVNEKSIDIYSFGVVLLELVTGKLPIDPEFGEKDLV  
KWVCTNLDQKGFDSVIDPKLDSTYKEEICRVLEISLLCTSALPINRPSMRKVVKLLQEAS  
ADIKSKITNKKDGKLSPIYYEYTSQFVV

**>LcHSL1 (ID number: LITCHI029130.m1)**

MVFLYVLILFLFSPLPSLSLNQEGLYLQRVKHTLSDPNSALSSWDNDRDDTPCSWFGVKC  
DPRGQSVTSIDLSNANIAGPFPSFVCRLQHLTFLSLYNNSINSTLPDDLATCRNLEHLDL  
AQNLLTGTLPDSDLADLPSLKYLDLTANNFSGEIPDSFGRFQKLEVISLVYNLLDGTIPPF  
LGNISLRLMLNLSYNPFLPGRIPAELGYLTNLEILWLTECNLVGEIPDSLGRGLKLVLDL  
LAVNNLGGTIPSSLSGLTSVVQIELYNNSLTGELPTGWSNLTKLRLLDASMNDLSGPIPD  
ELTRLPLESLNLYENRFEGDLPESIADSPGLYELRLFRNRLTGQLPKNLGKNSPLKWLDV  
SNNQFTGEIPENLCEKGELEELIIYNSFTGPIPESLGRCQSLTRVRLGYNQLSGEVPPL  
FWGLPHVYLLELIDNSFSGQIAKTIAGAANLSLLIISKNNFSGSLPEEIGFLKTLFTFSG  
SENRFSGPLPESLKNLGEIGTLDLHDNELSGELPTSVRSWKKLNELNLANNEFYGSIPDD  
IGTLSVLNYLDLSNNRLSGKIPVGLQNLKLNRLNVSNNRLSGELPPLFAKDMYKSSFIGN  
PGLCGDLEGLCGGREGEKNGRYVWLLRSIFVLAAVVFVFGLVWFYLYKRYKFKNARAIDRS  
KWTLMSFHKLGFEYEILDGLDEDNVIGSGASGKVYKVVLNNGEAVAVKKLWGGVKKECE  
SGDLEKQQAQVQVQDDGFQAEIETLGKIRHKNIIVKLWCCCTTRDCKLLVYEYMPNGSLGD  
LLHSSKGGLLDWPTRYKIIVDAAEGLSYLHHDCVPPIVHRDVKSNNILLDGDGFARVADF

GVAKVVETSGKPKSMSVIAGSCGYIAPEYAYTLRVNEKSIDIYSFGVVILELVTGRRPIDP  
EFGERDLVRWVCTTLDQKGVDHVIDSKLDSCFKEEICKVLNIGLLCTSPLPINRPAMRRV  
VKLLQEVGAENQPKPAKKDGKLSPIYYEDASDHGSVA

**>LcHSL2 (ID number: LITCHI007137.m1)**

MKYQSIKLFLLFSLLYSFSPVNSLKEVTQILFLVKSGQLHDSNGKLNWVPTSDKSPC  
NWTGITCDAQNQSVVGVDLSGLRISGGFPNGFCRIRTLKNLTLDNSFNGLTSPQSLSPC  
SHLQVLELSSNYFTGELPDLPREFSSLQVLNLYNNELSGDIPTSFGRFPALKVLNLGGNY  
IGGSIPWFLSNLSELTTLQLGYNPFKPSPLPPSYGNLSKLETWVARANLVGEIPESIGK  
LATLTNLDLSDNFLSGKIPYTIGGLTTVVQIELYNSLSGELPESLANLTALLRLDVSQN  
NLTGTLNQNIASMSLQSLNLDNHFTGEIPEILALNPNLSELKLFNNSFSGKLPENLGKF  
SDLQDFDVSTNDFTGELPPFLCHRNLLQNLVIFSNRFSGNLPKSYGECQPLYVVRMGNNR  
LSGEVPAKFWGLPRLEFLEMNNNFDGPISPSISRARNLTHLLISGNNFSGRIPSAVCDL  
HQLLFFNTGRNRLSGEVPSCIAQLNKLQKLDLNQNMFTGELPGRDLTDLTELNLSNNR  
FTGEIPRELGNLPVLEHLDLSSNMLTGEIPVELTKLKNQFNVSNNQLYGKVPSPGFDHLL  
FVSSLLGNLALCSRDLKPLPPCPRNRPETVFFASILAICVVLTGSLVWVFIKTKSNYVNK  
PKGRWKVTTFQRVGFTEEDIIPHLTEENLIGSGSGQVYRVKLKTGQTVAVKRLWSGKLY  
LETETVFNSEIEILGRIRHGNIVKLLQCCSGEECRILVYEYMENGLGDVLHGERGGASL  
QDWRTRLTIALGIAQGLAYLHHDCVPTIVHRDVKSNNILLDAEMMPRLADFGGLAKTLEAD  
GSMSRLAGSYGYIAPEYAYTSKVNEKSDVYSFGVLLMELIMGRRPNDACFGENKDIVRWV  
TETALSCPERETTENDSSYCKDLRKLVDPRIKQSTCNYYEIEKVLKVALLCTASFPPNRP  
SMRRVVALLNAKAVTRPK
